# Supplementary material for: Optimizing electrochemical alcohol oxidation reactions via defect-rich CoFe-layered double hydroxide
Source: Royal Society of Chemistry journal article supplement (doi:10.1039/d4ta08442j), 2025-01-01
Supplement: d4ta08442j1.pdf [file d4ta08442j1.pdf]

## Supplementary Information for

# Optimizing electrochemical alcohols oxidation reactions via defect-rich CoFe-layered double hydroxide

Xingjian Sun, Ruikang Zhang,\* Han Lu, Qichao Yan, Sicong Sun, Yuanzhe Gao\*

*Hebei Technology Innovation Center for Energy Conversion Materials and Devices,  
College of Chemistry and Materials Science, Hebei Normal University, Shijiazhuang,*

*Hebei 050024, China*

*E-mail: [zhangruikang@hebtu.edu.cn](mailto:zhangruikang@hebtu.edu.cn) (R. Zhang)*

*E-mail: [yzgao2003@126.com](mailto:yzgao2003@126.com) (Y. Gao)*

## Experimental Details

All potentials in this work were adjusted to the reversible hydrogen electrode (RHE), according to the equation:  $E_{RHE} = E_{applied} + E_{Hg/HgO} + 0.0592pH$ . The Tafel slope was calculated from the Tafel equation as follows:  $\eta = b \log i$ , where  $\eta$  is the overpotential and  $b$  is the Tafel slope.

CoFe-LDH and CoFe-LDH-Don the nickel foam were sonicated to collect the powder. Then, the powder was acidified with 0.1 M HCl and finally the metal ion concentration was tested by inductively coupled plasma atomic emission spectrometer (ICP-AES). The liquid product is detected by taking 1 ml of electrolyte and performing a nuclear magnetic test with dimethyl sulfoxide (DMSO, 99.9%) as a solvent.

The Faradaic efficiency (FE) of acetate was calculated as:  $FE = (n \times c \times V \times F/Q)$

\*100%, where  $n$  is the number of transferred electrons, for acetate,  $n = 4$ ,  $F$  is the Faraday constant,  $c$  is the concentration of acetate in the electrolyte as determined by ion chromatography,  $V$  is the volume of the electrolyte used for ethanol oxidation electrolyte, and  $Q$  is the quantity of applied electric charges during the chronoamperometric measurements of EOR. (In this experiment, we took 1 ml electrolyte and then diluted 50 times for ion chromatography to detect acetate concentration;  $Q$  is given by the automatic integration given by the electrochemical work station. )

The coverage ( $\tau^*$ ) was calculated as:  $I_p = (n^2 F^2 / 4RT) v A \tau^*$ . In this formula,  $I_p$  represents the Co redox peak current density,  $n$  is the number of electrons involved in the transfer ( $\text{Co}^{3+}/\text{Co}^{4+}$ ,  $n = 1$ ),  $F$  is the Faraday constant ( $96845 \text{ C mol}^{-1}$ ),  $R$  is the ideal gas constant ( $8.314 \text{ J}^{-1} \text{ mol}^{-1}$ ),  $T$  is the temperature maintained at  $298.15 \text{ K}$ ,  $v$  is the scanning rate of the cyclic voltammetric curve,  $A$  refers to the geometric surface area of the glassy carbon electrode which is  $0.196 \text{ cm}^2$ , and  $\tau^*$  indicates the surface coverage of the redox-active species.

### **Computational Details:**

CoFe-LDH and CoFe-LDH-D models: The models were built on the basis of XRD and ICP-AAS results. The space group is  $p3m1$ , with lattice parameter  $\alpha = \beta = 90^\circ$ ,  $\gamma = 120^\circ$ . The (003) and (110) facet of NiFe-LDH were located at  $2\theta = 11.41^\circ$  and  $59.94^\circ$ , respectively. the lattice parameters deduced to be  $a = b = 3.08 \text{ \AA}$ , and  $c = 7.17 \text{ \AA}$ . The supercell of CoFe-LDH is set to be  $5 \times 3 \times 1$  in the  $a$ -,  $b$ -, and  $c$ -direction. CoFe-LDH model. Chloride anions are placed into the interlayer gallery of LDHs to

keep the charge neutral. The atomic numbers of Co-Fe-O-H-Cl were 11-4-30-30-4 in the CoFe-LDH. One Fe atom were removed from CoFe-LDH model to built CoFe-LDH-D model.

Computational Methods: All the calculations are performed using the Forcite code in the Materials Studio, version 6.1 software package. The geometry optimizations are based on the following points: (1) Forcefield is Universal; (2) the electrostatic is Ewald; (3) the quality is Ultra-fine. The adsorption models is created by installing the LDH slab on the (001) surface, and the vacuum distance here is set to be 30 Å to eliminate the interactions between the replicas of the slab model. Adsorption Locator tools are used to investigate the minimum adsorption energies of the intermediate species.

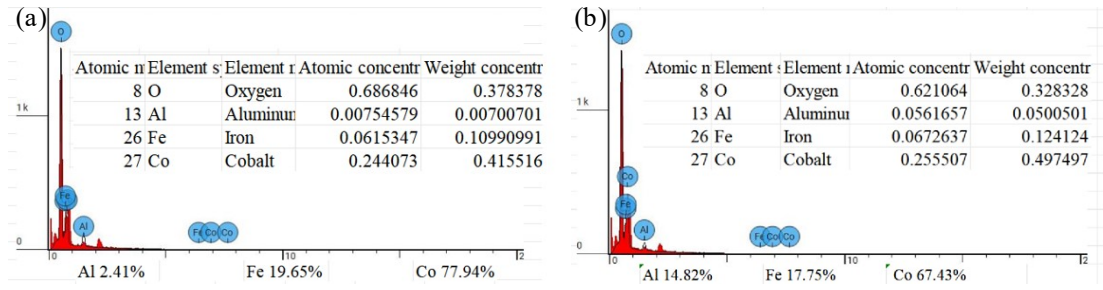

**Fig. S1** The EDS of (a) CoFe-LDH-D and (b) CoFeAl-LDH.

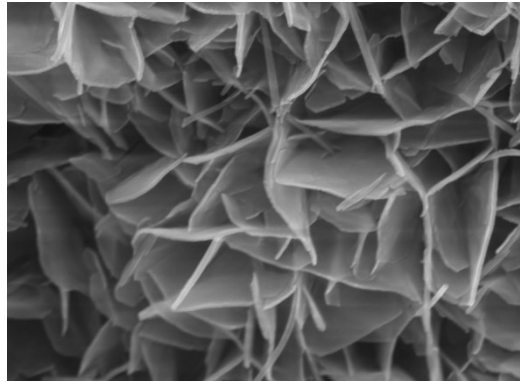

**Fig. S2** SEM images of CoFe-LDH.

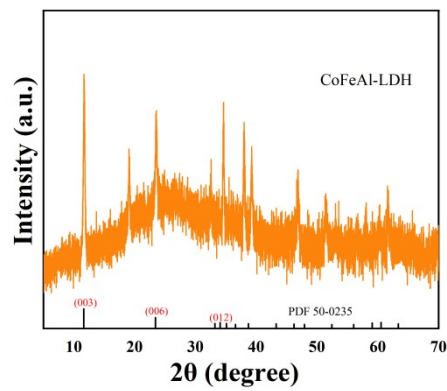

**Fig. S3** XRD patterns of CoFeAl-LDH.

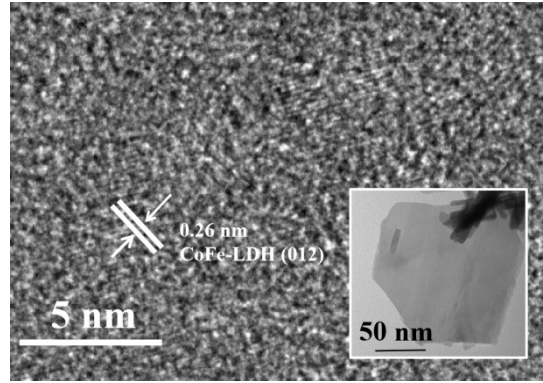

Fig. S4 The TEM image of CoFe-LDH.

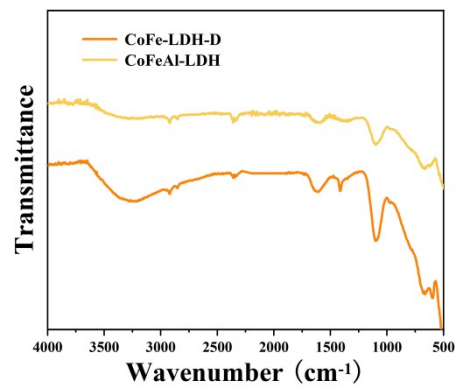

Fig. S5 The FT-IR spectroscopy of CoFe-LDH-D and CoFeAl-LDH.

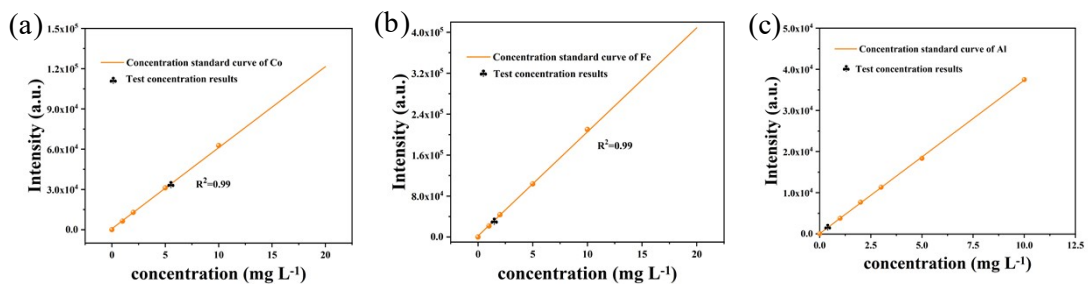

Fig. S6 The correction curve of the Co, Fe, Al.

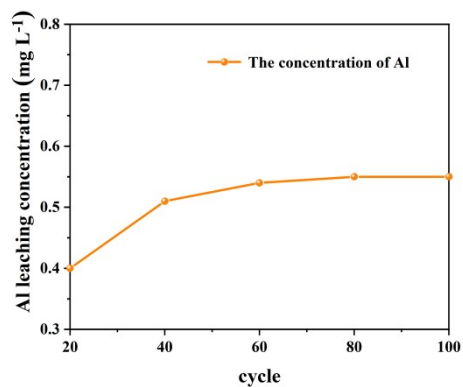

**Fig. S7** The concentration of Al in the electrolyte during electrochemical base activation.

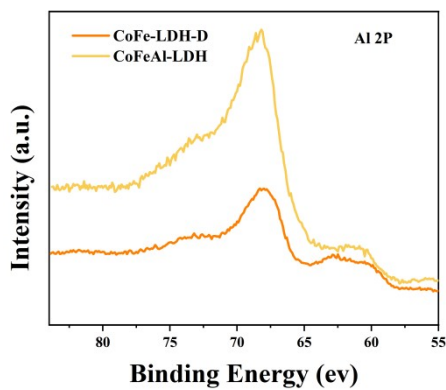

**Fig. S8** Al 2P XPS of CoFeAl-LDH and CoFe-LDH-D.

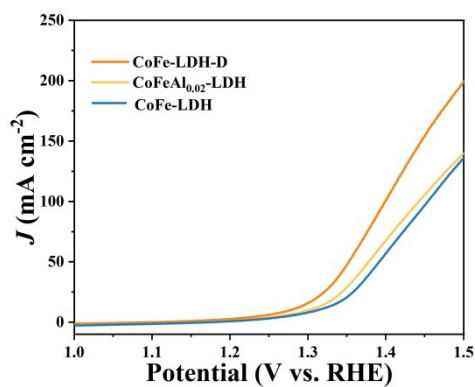

**Fig. S9** The LSV of CoFe-LDH-D, CoFeAl-LDH and CoFe-LDH.

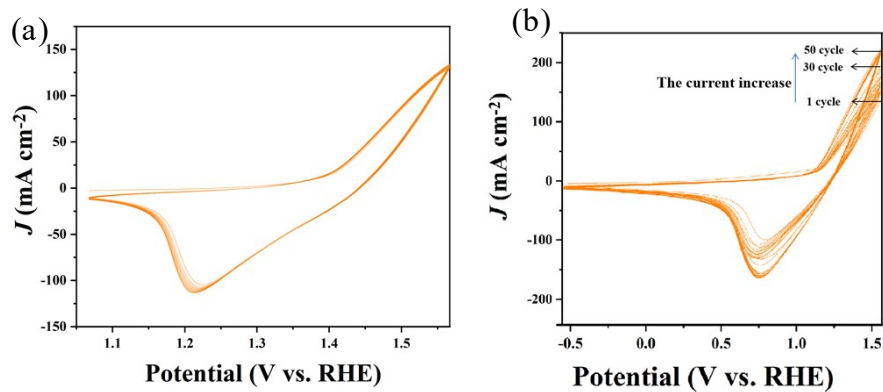

**Fig. S10** The CV cycling curves of CoFeAl-LDH in the voltage range of 1.07 to 1.57 V vs. RHE and -0.57 to 1.57 V vs. RHE.

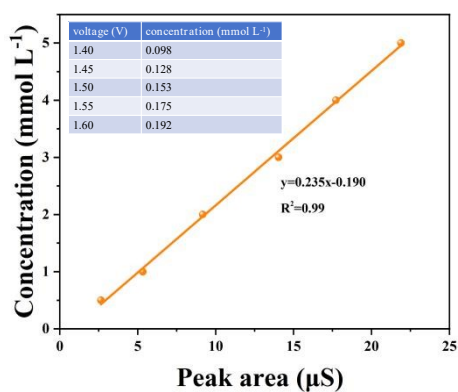

**Fig. S11** The correction curve of the  $\text{CH}_3\text{COO}^-$ .

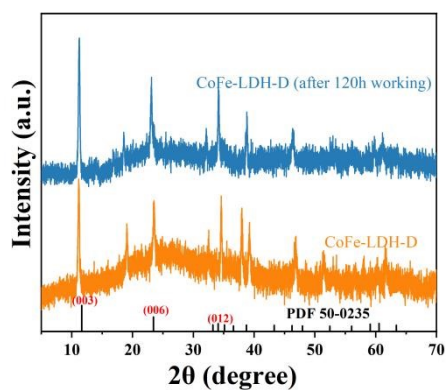

**Fig. S12** XRD patterns of CoFe-LDH-D after working 120 h.

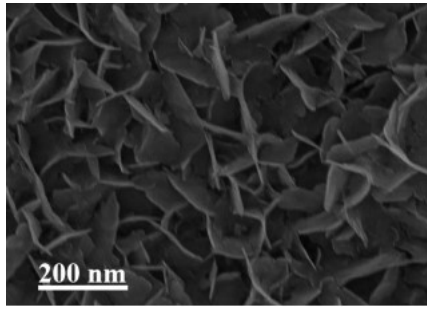

Fig. S13 SEM image of CoFe-LDH-D after working 120 h.

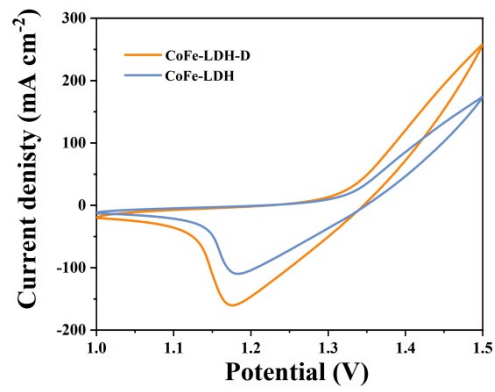

Fig. S14 The cyclic voltammetry (CV) curves of CoFe-LDH-D and CoFe-LDH in KOH-ethanol electrolyte.

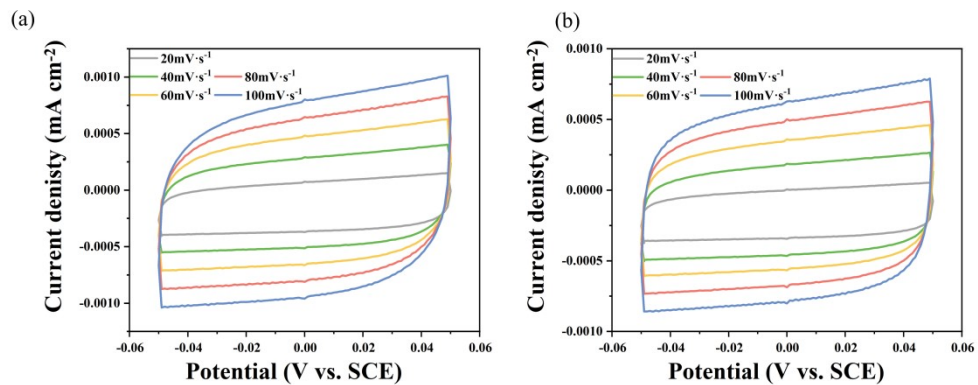

Fig. S15 The CV in the non Faradaic region of -0.05 to 0.05 V of (a) CoFe-LDH-D and (b) CoFe-LDH.



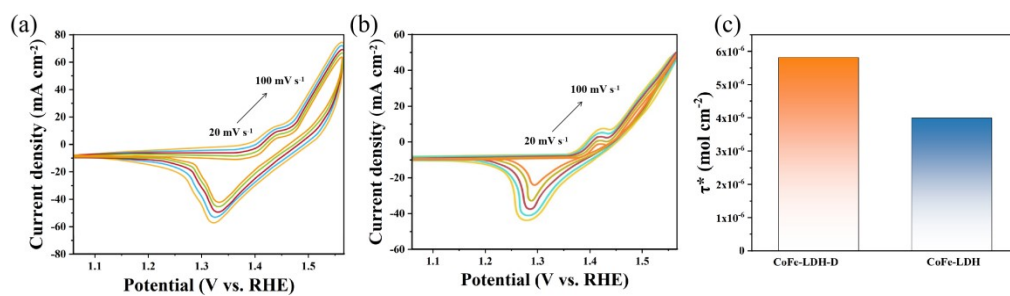

**Fig. S16** CV curves of (a) CoFe-LDH-D and (b) CoFe-LDH in 1.0 M KOH in the potential range 1.07-1.57 V vs. RHE and at a scan rate of 20-100 mV s<sup>-1</sup>.

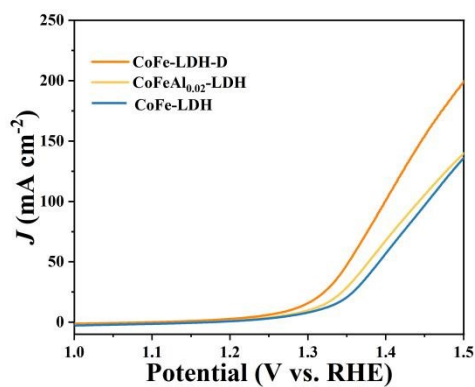

**Fig. S17** LSV curves of CoFe-LDH-D, CoFeAl<sub>0.02</sub>-LDH and CoFe-LDH.

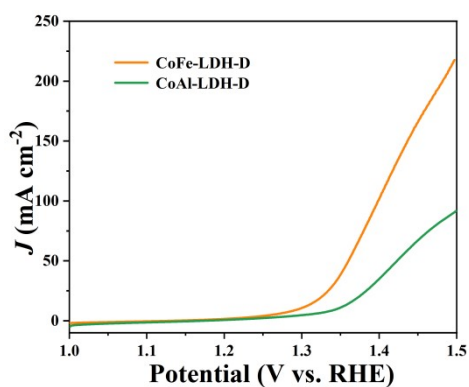

**Fig. S18** LSV curves of CoFe-LDH-D and CoAl-LDH-D.

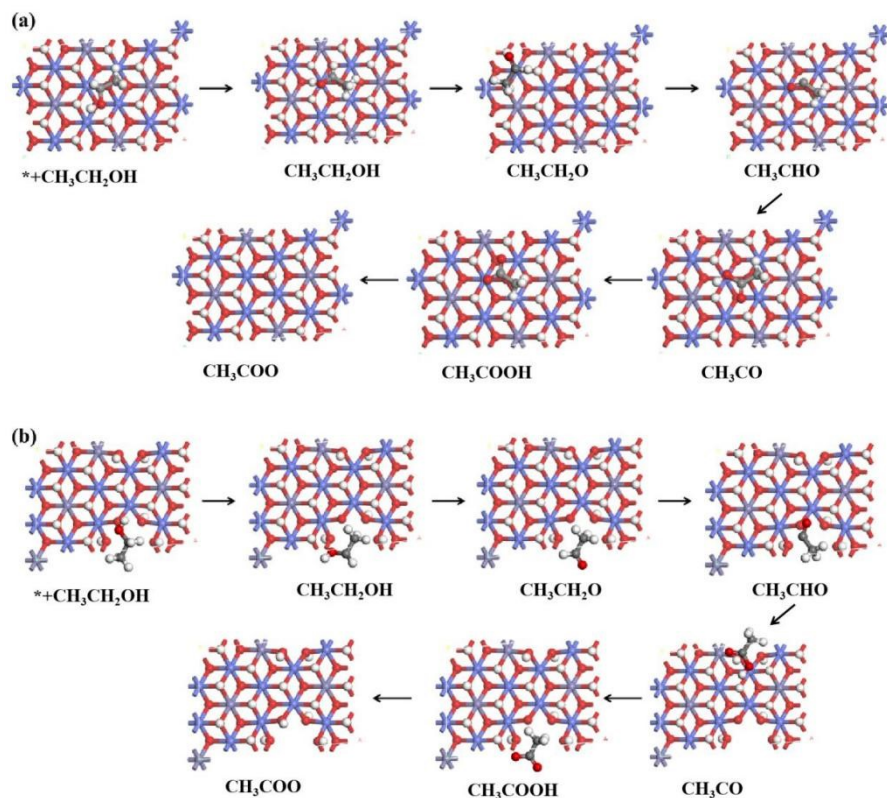

**Fig. S19** The structure of CoFe-LDH and CoFe-LDH-D during the EOR process.

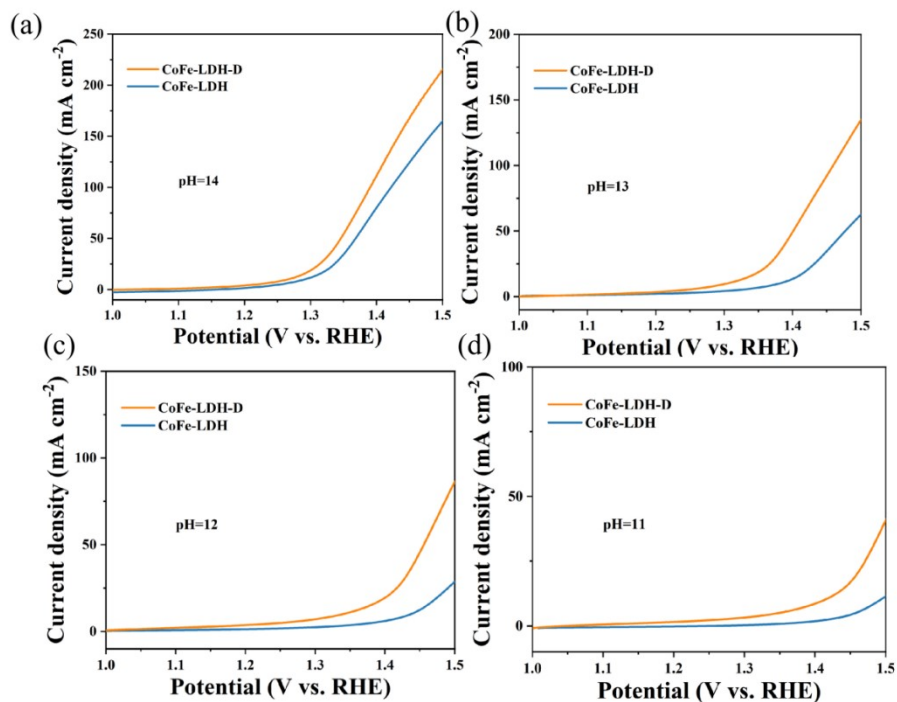

**Fig. S20** The LSV of CoFe-LDH-D and CoFe-LDH at (a) pH=14, (b) pH=13, (c) pH=12, and (d) pH=11.
